# Supplementary material
Source: Springer Nature journal article supplement (https://www.springermedizin.de/resource/supplementary/12903_2013_343_MOESM2_ESM.pdf/9516954)
Supplement: MOESM2 [file 9516954]

**Table 4 - Logistic regression results for associations with HPV seropositivity among 205 men attending an STI clinic in PR**

| <b>Variable</b>                     | <b>Unadjusted<br/>OR (95% CI)</b> | <b>p-value</b> | <b>Model 1<br/>Adjusted OR<br/>(95% CI)</b> | <b>p-value</b> | <b>Model 2<br/>Adjusted OR<br/>(95% CI)</b> | <b>p-value</b> | <b>Model 3<br/>Adjusted OR<br/>(95% CI)</b> | <b>p-value</b> |
|-------------------------------------|-----------------------------------|----------------|---------------------------------------------|----------------|---------------------------------------------|----------------|---------------------------------------------|----------------|
| <b><u>Age at recruitment</u></b>    |                                   |                |                                             |                |                                             |                |                                             |                |
| 16-24                               | 1.00                              |                | 1.00                                        | 0.021*         | 1.00                                        | 0.059*         | 1.00                                        | 0.074*         |
| 25-34                               | 0.20 (0.02, 1.75)                 | 0.144          | 0.15 (0.02, 1.40)                           | 0.097          | 0.18 (0.02,1.62)                            | 0.126          | 0.13 (0.01,1.22)                            | 0.075          |
| 35-44                               | 2.87 (0.90, 9.12)                 | 0.076          | 2.28 (0.70, 7.43)                           | 0.172          | 2.39 (0.70,8.18)                            | 0.164          | 1.86 (0.54, 6.46)                           | 0.328          |
| 45-54                               | 3.07 (0.99, 9.52)                 | 0.052          | 2.68 (0.85, 8.47)                           | 0.093          | 2.77 (8.53, 8.96)                           | 0.090          | 2.28 (0.69, 7.51)                           | 0.174          |
| 55+                                 | 4.11 (1.23, 13.70)                | 0.022          | 3.68 (1.08,12.57)                           | 0.037          | 2.54 (0.70,9.26)                            | 0.157          | 2.15 (0.58, 7.98)                           | 0.254          |
| <b>P trend</b>                      | 0.001                             |                |                                             |                |                                             |                |                                             |                |
| <b>Log Likelihood</b>               | <b>180.39</b>                     |                |                                             |                |                                             |                |                                             |                |
| <b><u>Lifetime sex partners</u></b> |                                   |                |                                             |                |                                             |                |                                             |                |
|                                     | 1.02 (1.01,1.03)                  | <0.001         |                                             |                | 1.02 (1.01, 1.03)                           | 0.002          | 1.02 (1.01,1.03)                            | 0.002          |
| <b>Log Likelihood</b>               | <b>180.47</b>                     |                |                                             |                | <b>161.22</b>                               |                |                                             |                |
| <b><u>Lifetime smoking</u></b>      |                                   |                |                                             |                |                                             |                |                                             |                |
| No                                  | 1.00                              |                | 1.00                                        |                |                                             |                | 1.00                                        |                |
| Yes                                 | 3.10 (1.15,8.36)                  | 0.026          | 3.20 (1.14, 8.95)                           | 0.027          |                                             |                | 3.00 (0.98,9.16)                            | 0.054          |
| <b>Log Likelihood</b>               | <b>198.64</b>                     |                | <b>174.56</b>                               |                |                                             |                | <b>156.87</b>                               |                |

\*overall p-value (Wald)
